# Supplementary material
Source: Frontiers journal article supplement (https://www.frontiersin.org/articles/441534)
Supplement: Table_1.DOCX [file Table_1.DOCX]

**Appendix 1.** Summary integration tables for integrated attributes “Other Chemical Attributes”, “Orography” and “Macro Elements” that were changed based on data mining results. * denotes all possible levels on the scale “low”, “medium”, “high”.

**Other chemical attributes**


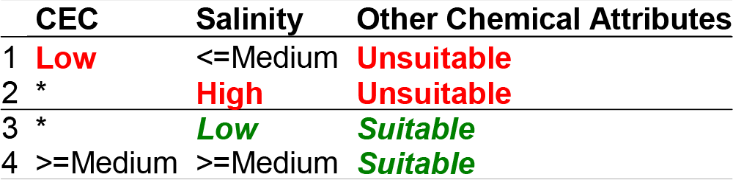


**Integration table before data mining**


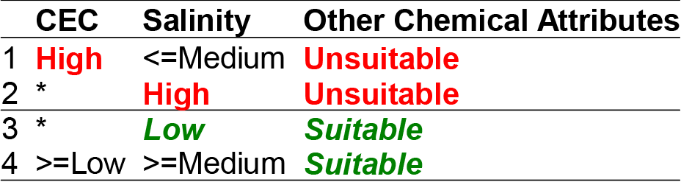


**Integration table after data mining**

**Macro Elements**


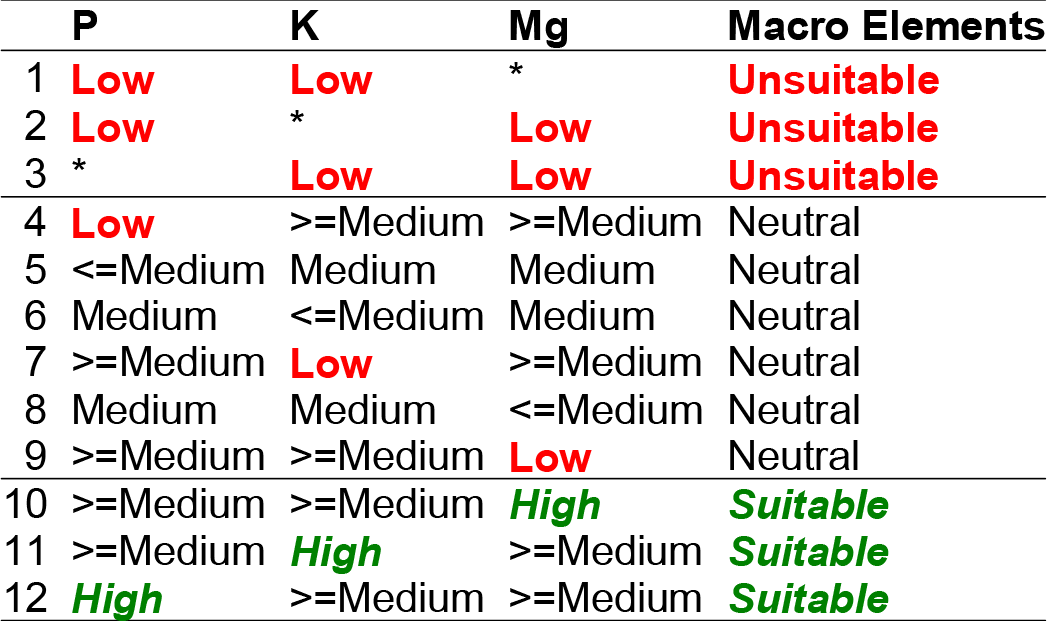


**Integration table before data mining**


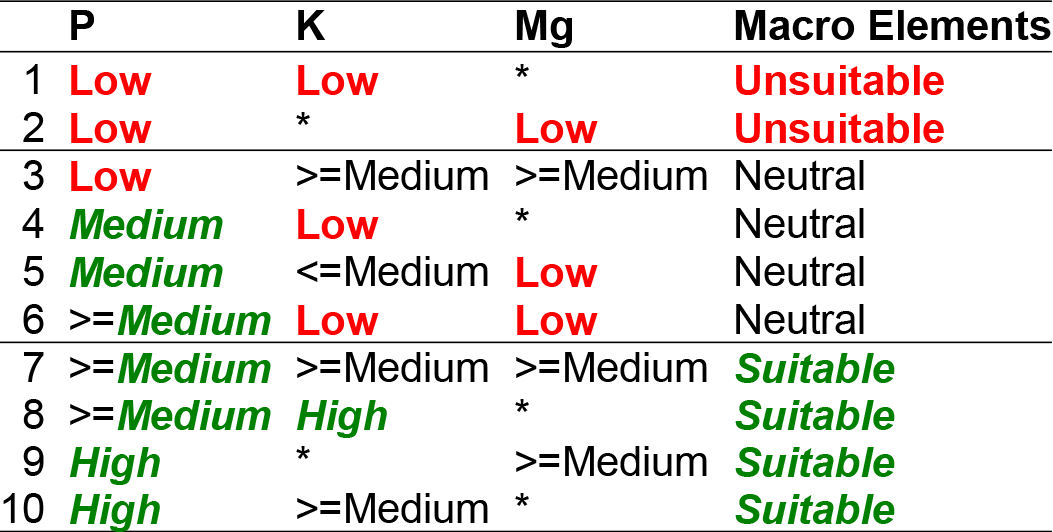


**Integration table after data mining**

**Orography**


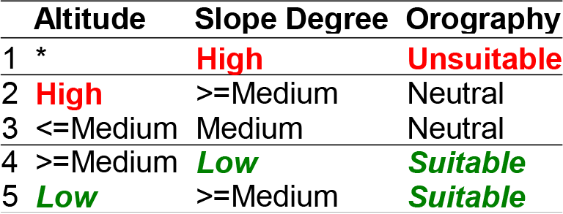


**Integration table before data mining**


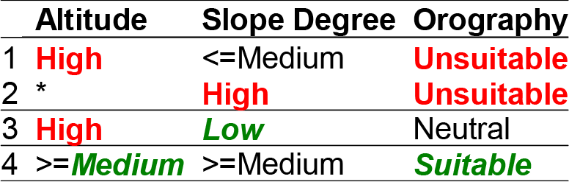


**Integration table after data mining**
